# Supplementary material for: Research on the energy storage performance of laminated composites based on multidimensional co-design in a broad temperature range
Source: Royal Society of Chemistry journal article supplement (doi:10.1039/d4nr00189c), 2024-01-01
Supplement: d4nr00189c1.pdf [file d4nr00189c1.pdf]

**Research on the energy storage performance of laminated composite based on  
multidimensional co-design in a broad temperature region**

Yipeng Tan<sup>a,c,1</sup>, Jiayu Deng<sup>a,1</sup>, Hang Gao<sup>a,c</sup>, Ziwen Feng<sup>a,c</sup>, Linfei Lu<sup>a,b,c</sup>, Jiheng  
Wang<sup>a</sup>, Zhongbin Pan<sup>d</sup>, Lingmin Yao<sup>a,b,c,\*</sup>, Qinglin Deng<sup>a,c,\*</sup>.

<sup>a</sup> School of Physics and Materials Science, Guangzhou University, Guangzhou 510006,  
P. R. China

<sup>b</sup> Joint Institute of Guangzhou University & Institute of Corrosion Science and  
Technology, Guangzhou University, Guangzhou 510275, China

<sup>c</sup> Research Center for Advanced Information Materials, Huangpu Research & Graduate  
School of Guangzhou University, Guangzhou 510275, China

<sup>d</sup> School of Materials Science and Chemical Engineering, Ningbo University, Ningbo  
315211, China.

<sup>1</sup> These authors contributed equally to this work and should be considered co-  
first authors

\* Corresponding authors: [Lingminyao@gzhu.edu.cn](mailto:Lingminyao@gzhu.edu.cn) (Lingmin Yao),  
[qldeng@gzhu.edu.cn](mailto:qldeng@gzhu.edu.cn) (Qinglin Deng)

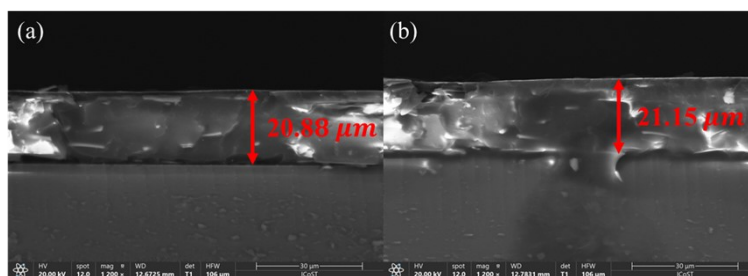

Fig.S1 SEM result of (A-T-A)/PI composite cross section.

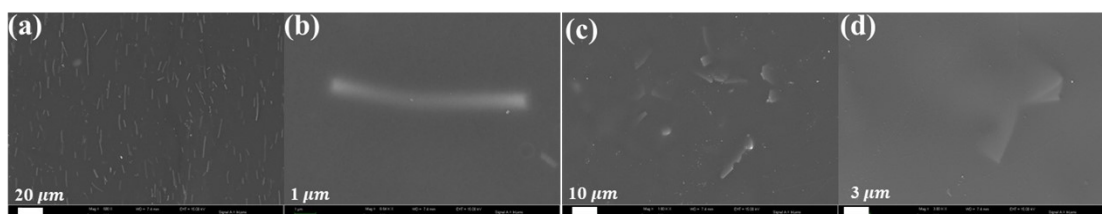

Fig.S2 (a, b) SEM images of the TiO<sub>2</sub>/PI composite surface. (c, d) SEM images of the Al<sub>2</sub>O<sub>3</sub>/PI composite surface.

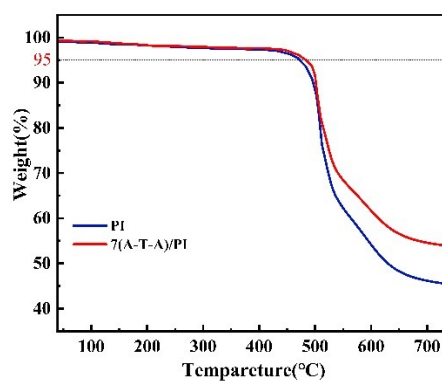

Fig. S3 TGA result of 7(A-T-A)/PI and pure PI.

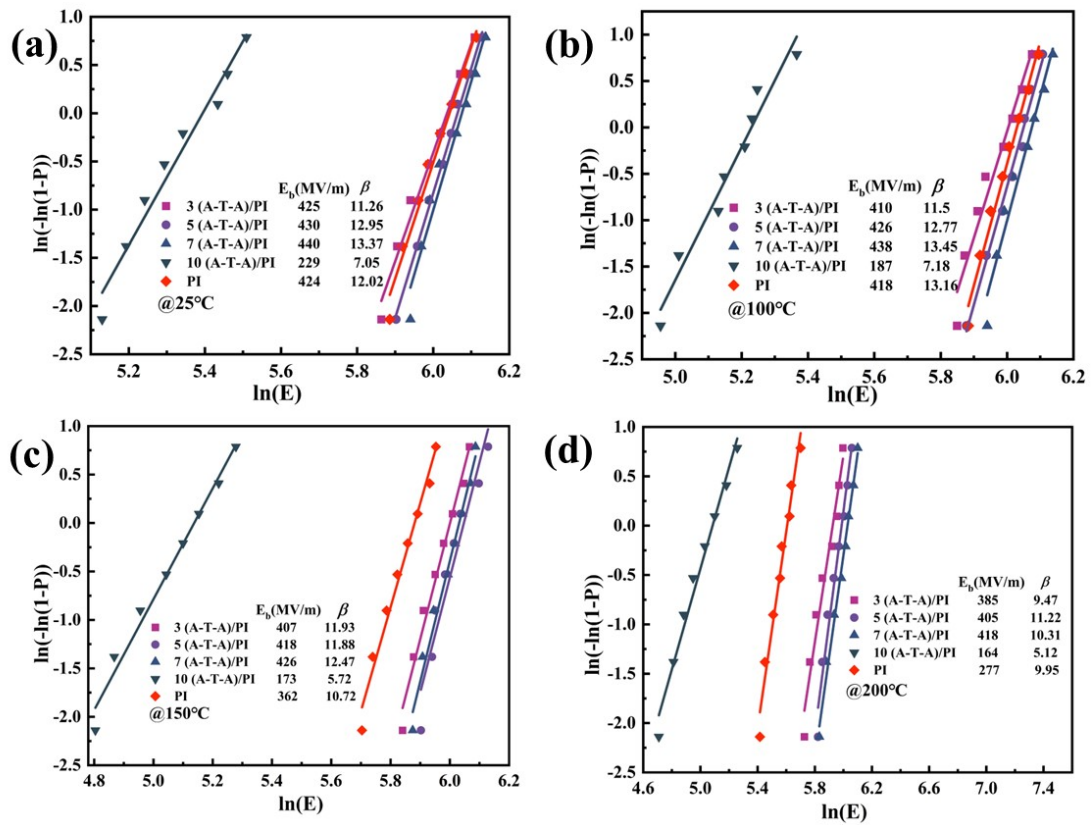

Fig. S4 The  $E_b$  and  $\beta$  of the composite films at (a) 25 °C, (b) 100 °C, (c) 150 °C, and (d) 200 °C.

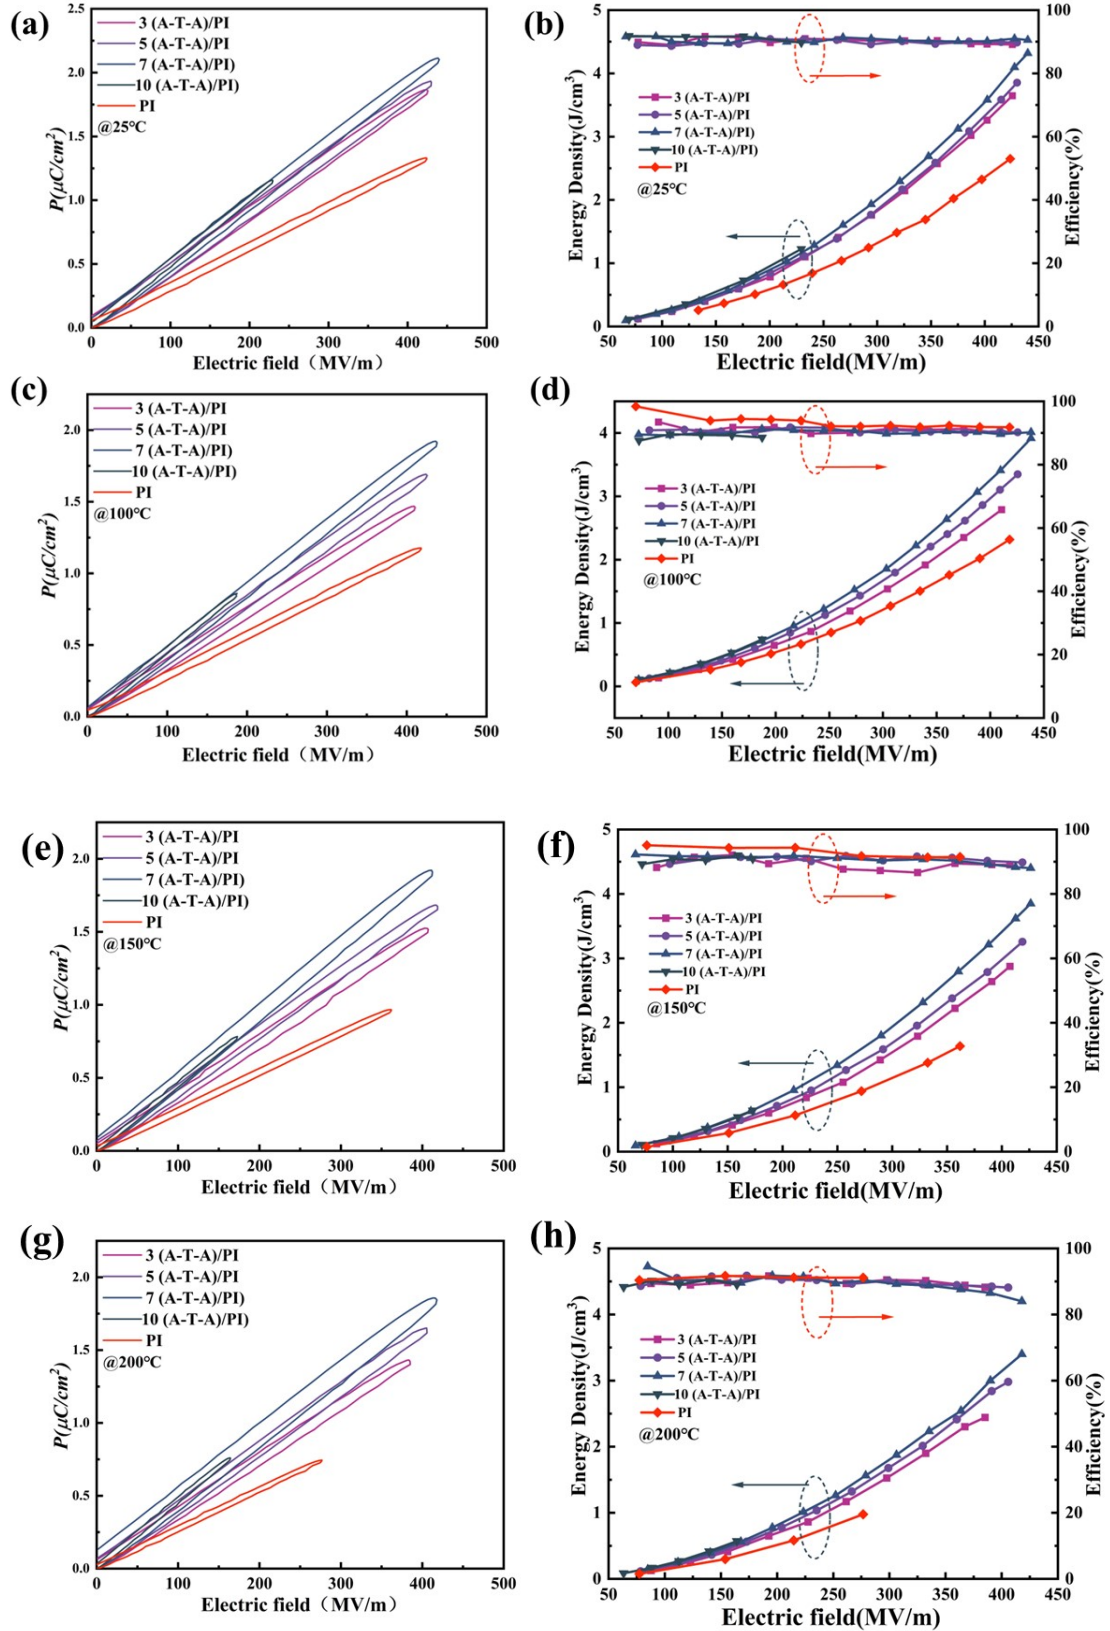

Fig. S5 (a) D–E loops and (b) energy storage performance at 25 °C. (c) D–E loops and (d) energy storage performance at 100 °C. (e) D–E loops and (f) energy storage performance at 150 °C. (g) D–E loops and (h) energy storage performance at 200 °C.
